# Supplementary material for: The gene expression of CALD1, CDH2, and POSTN in fibroblast are related to idiopathic pulmonary fibrosis
Source: PubMed Central journal article supplement (PMC10869495; doi:10.3389/fimmu.2024.1275064), 2024-02-02

A

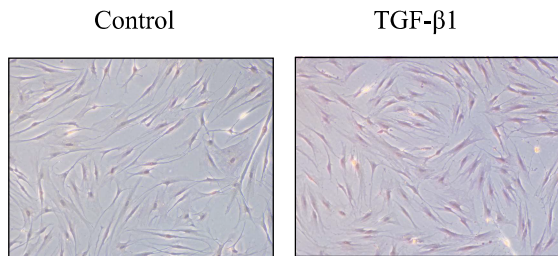

B

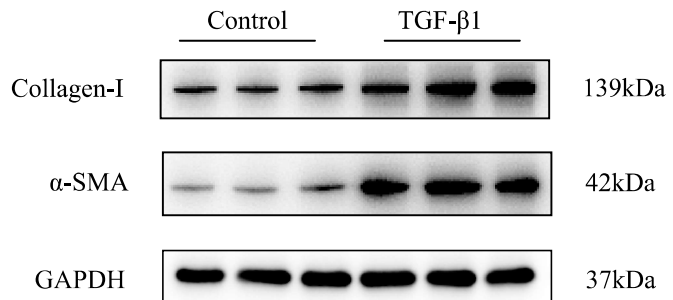

C

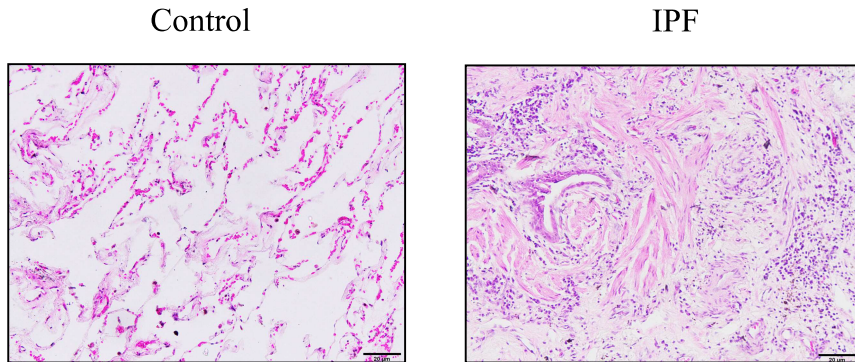

Supplement: Image_1.pdf [file Image_1.pdf]
